# Supplementary material
Source: PubMed Central journal article supplement (PMC6022402)
Supplement: NIHMS975429-supplement-supplement_1.pdf [file NIHMS975429-supplement-supplement_1.pdf]

## **Inventory of Supplemental Information**

- 1. Table 1 (DEGs RNAseq 3T3-L1 cells siCTL/siGPS2)**
- 2. Table 2 (DEGs RNAseq 293 cells siCTL/siGPS2)**
- 3. Table 3 (DEGs GROseq 3T3-L1 -/+FCCP, siCTL/siGPS2)**
- 4. Table 4 (GPS2 ChIPseq peaks gain upon FCCP)**
- 5. Table 5 (GPS2 ChIPseq peaks in BAT of Male and Female Mice)**
- 6. Supplemental Figure S1 (Related to Figure 1)**
- 7. Supplemental Figure S2 (Related to Figure 2)**
- 8. Supplemental Figure S3 (Related to Figure 3)**
- 9. Supplemental Figure S4 (Related to Figure 4)**
- 10. Supplemental Figures S5 (Related to Figure 5)**
- 11. Supplemental Figures S6 (Related to Figure 7)**
- 12. Legends of Supplemental Figures S1-S6**

## **Supplemental Information**

### **Mitochondrial retrograde signaling in mammals is mediated by the transcriptional cofactor GPS2 via direct mitochondria-to-nucleus translocation.**

Maria Dafne Cardamone, Bogdan Tanasa, Carly T. Cederquist, Jiawen Huang, Kiana Mahdavian, Wenbo Li, Michael G. Rosenfeld, Marc Liesa and Valentina Perissi

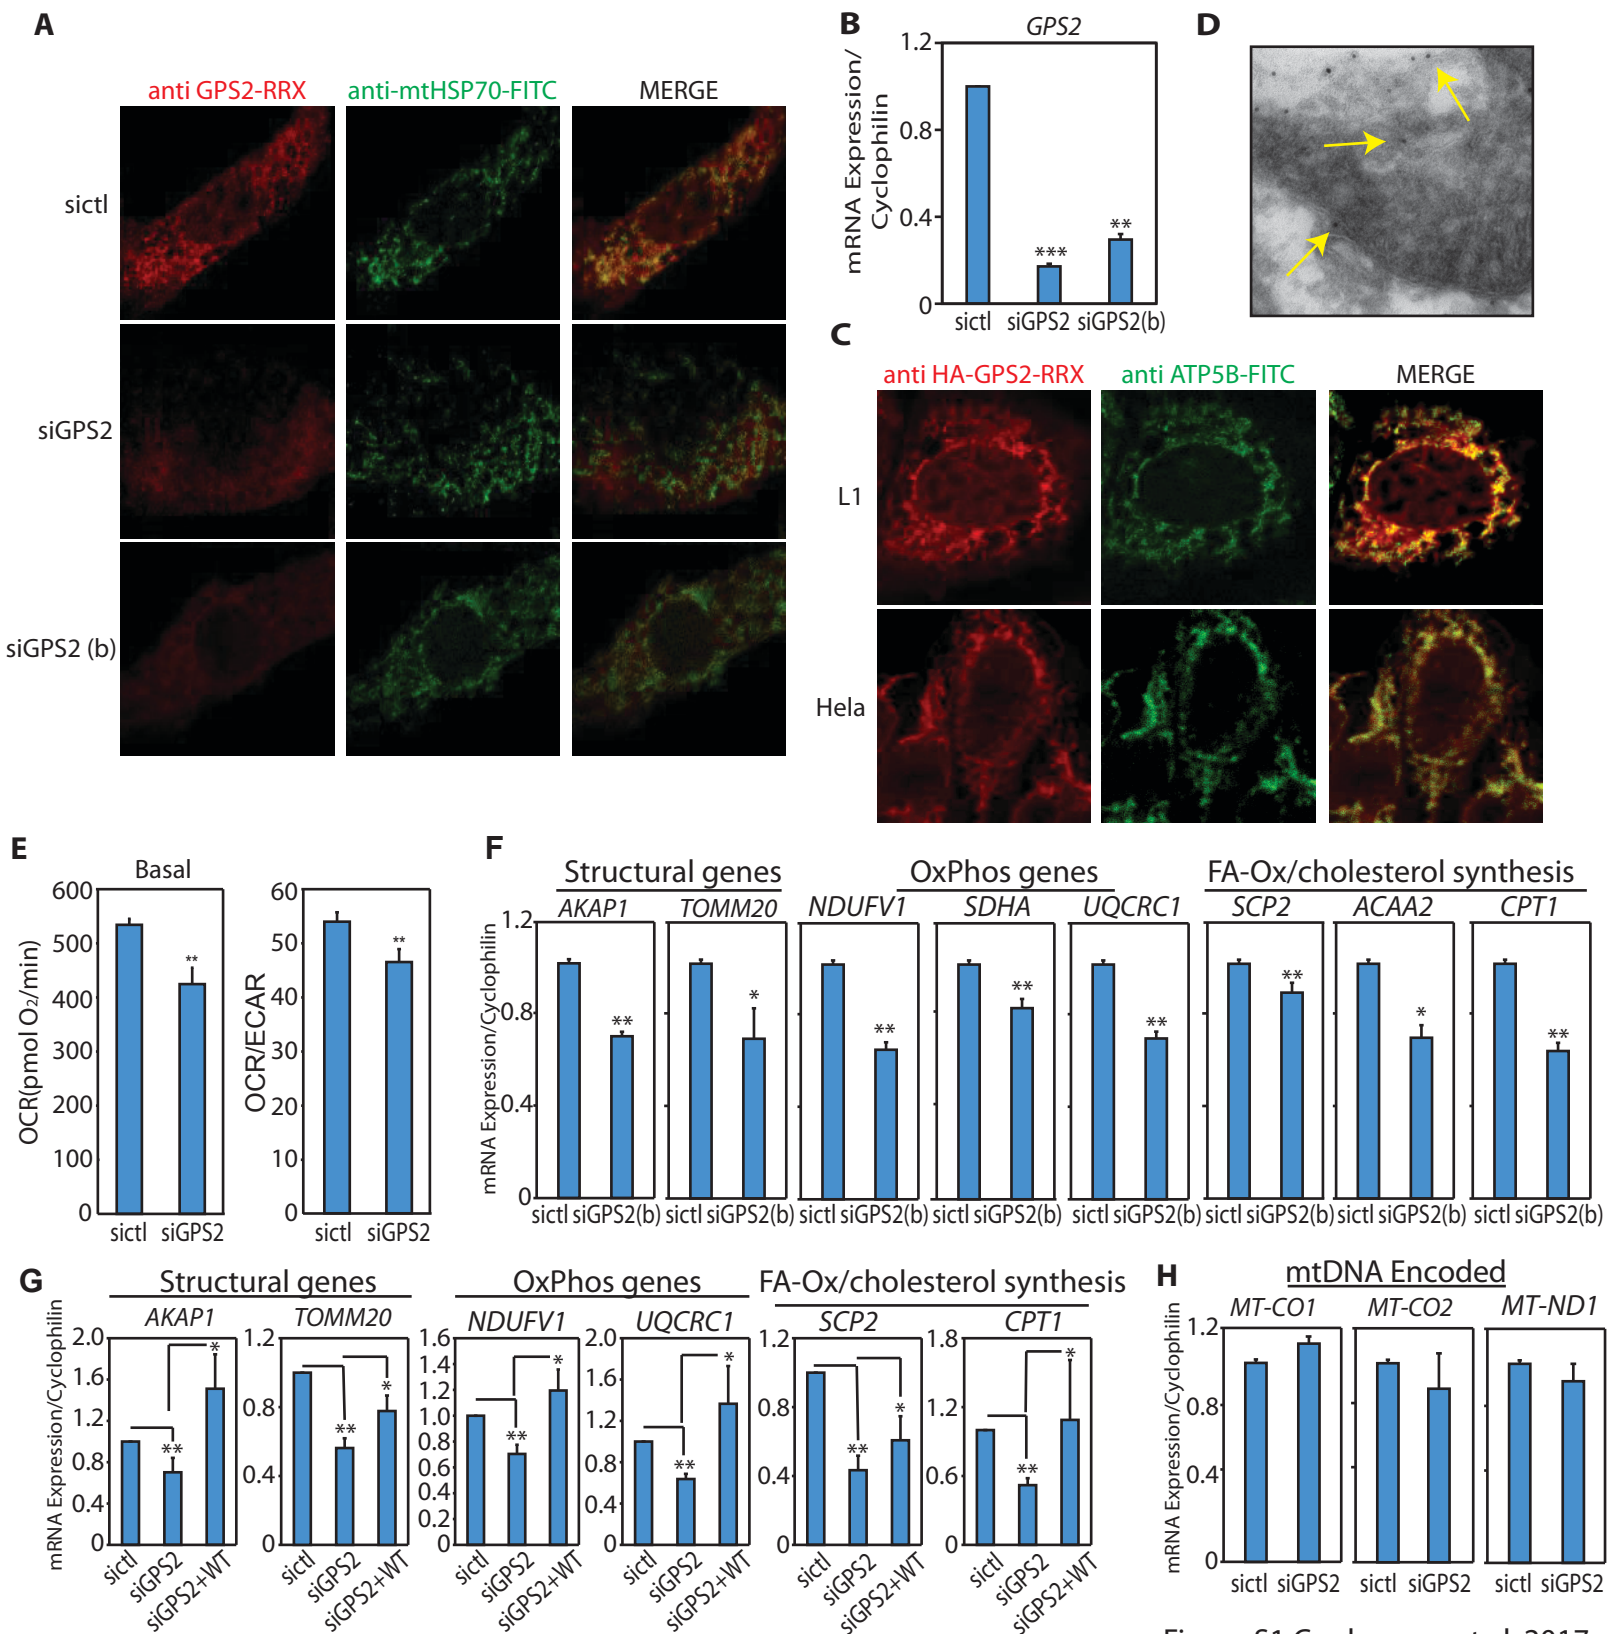

Figure S1 Cardamone et al. 2017

**Supplemental Figure S1. Related to Figure 1.**

**(A)** Mitochondria localization of endogenous GPS2 by IHF staining in murine 3T3-L1 cells, with two different siRNA against GPS2 used to confirm signal specificity. Co-staining of endogenous mtHSP70 serves as a mitochondrial marker.

**(B)** siRNA efficiency measured by qPCR analysis in transiently transfected 3T3-L1 cells.

**(C)** Mitochondria localization of overexpressed HA-GPS2 by IHF staining in murine 3T3-L1 and human Hela cells. Co-staining of endogenous mtATP5B serves as a mitochondrial marker.

**(D)** Mitochondria labeling by Immunogold EM for GPS2 in Hela cells.

**(E)** Decreased basal respiration and bioenergetic profile in Hela cells upon GPS2 downregulation.

**(F)** RT-qPCR analysis of different classes of neMITO genes expression in 3T3-L1 cells transfected with siCTL or siGPS2(b).

**(G)** Rescued expression of representative neMITO genes in GPS2-depleted 3T3-L1 cells by overexpressing HA-GPS2.

**(H)** RT-qPCR analysis of the expression of representative mitochondria-encoded genes in 3T3-L1 cells transfected with siCTL or siGPS2.

\* indicate p-value<0.05; \*\* indicate p-value<0.01.

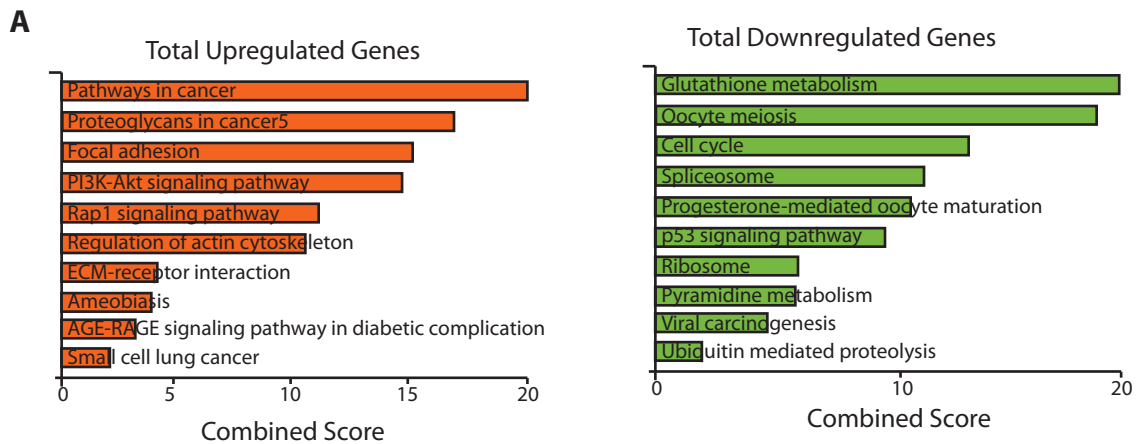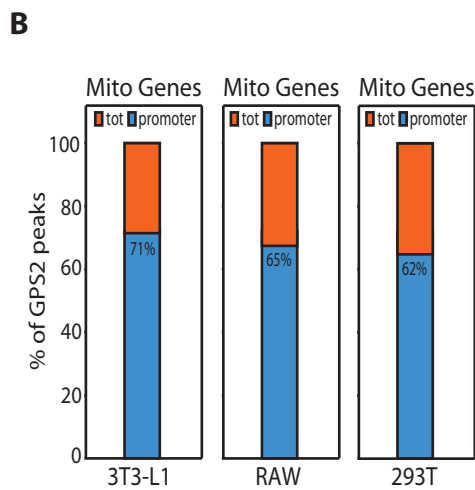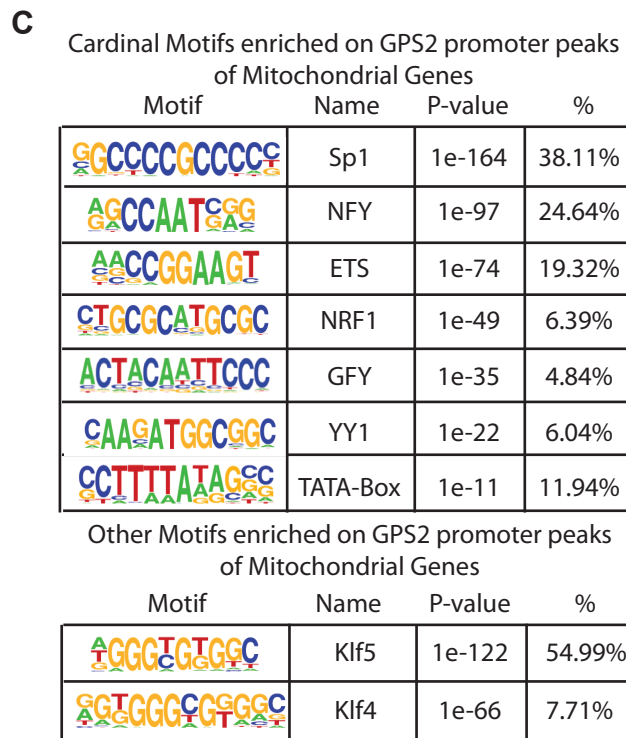

Figure S2 Cardamone et al. 2017

**Supplemental Figure S2. Related to Figure 2.**

**(A)** DE genes between WT and GPS2-KD 3T3-L1 cells by RNAseq. Analysis of the 10 most significant pathways associated with total upregulated (left) and downregulated (right) genes by EnrichR (KEGG Pathways).

**(B)** Percentage of GPS2 peaks on mitochondrial genes localized to promoter areas (+1kb/-200bp around TSS) in ChIPseq data sets from 3T3-L1 (GSE57779), 293T (GSE35197) and RAW (GSE66774) cells.

**(C)** Cardinal DNA-binding motifs and other TFs binding motifs enriched in the GPS2 peaks in 3T3-L1 cells as computed by HOMER Known Motifs enrichment analysis.

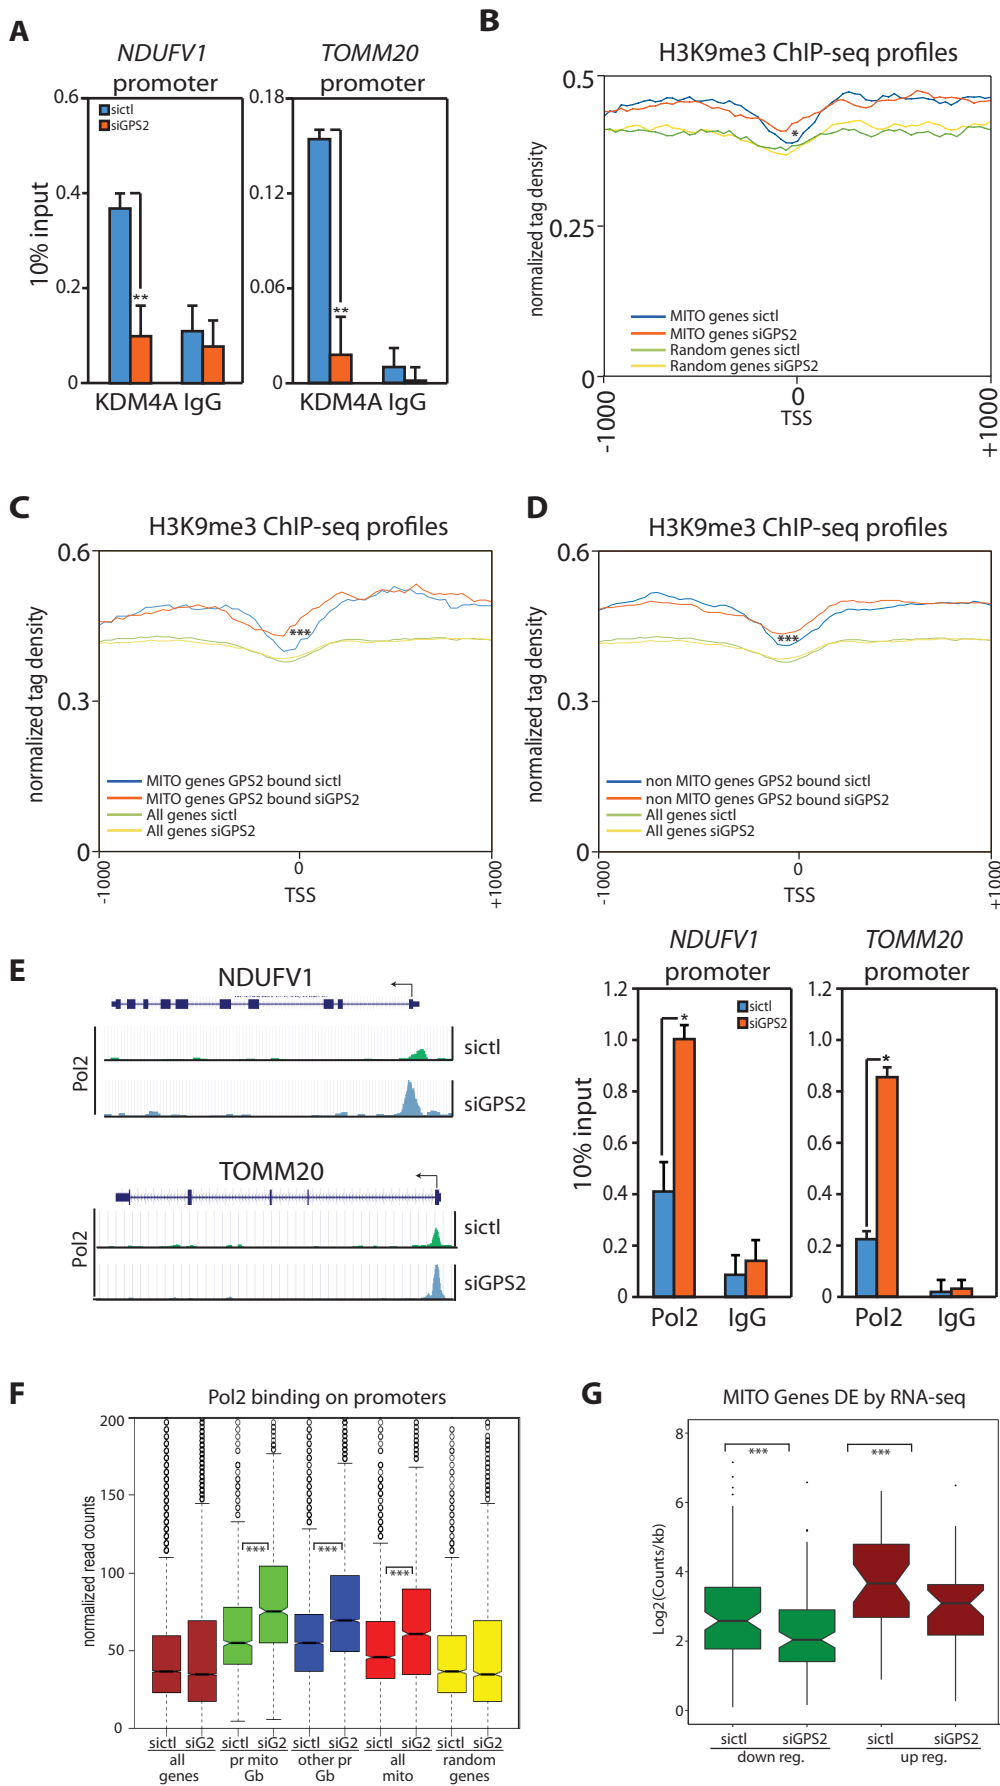

Figure S3 Cardamone et al. 2017

### Supplemental Figure S3. Related to Figure 3.

(A) Decrease in JMJD2A/KDM4A recruitment to *Ndufv1* and *Tomm20* gene promoters by ChIP in GPS2-KD 3T3-L1 cells.

(B) Tag density plot showing the increase in H3K9me3 binding on mitochondrial genes in GPS2-KD 3T3-L1 cells compared to randomly selected groups of comparable size (2086 genes). P-values were computed using the Wilcoxon test based on the difference in normalized counts +/-200bp around the TSS.

(C) (D) Tag density profile showing the increase in H3K9me3 binding on 962 GPS2 promoters of mitochondrial genes (C) or 4915 GPS2 bound promoters of non-mitochondrial genes (D) in GPS2-KD 3T3-L1 cells as determined by GPS2-ChIPseq in 3T3-L1 cells. P-values were computed using the Wilcoxon test based on the difference in normalized counts +/-200bp around the TSS.

(E) Representative ChIPseq tracks for POL2 binding to *Ndufv1* and *Tomm20* gene promoters on the UCSC browser. Validation of POL2 accumulation on target promoters in GPS2-KD 3T3-L1 cells by hand-ChIP.

(F) Boxplots showing a significant increase in POL2 binding specific to both the promoters of mitochondrial genes and the promoters of GPS2-bound genes in GPS2-KD 3T3-L1 cells. P-values were computed using the Wilcoxon test based on the difference in normalized counts +/-200bp around the TSS. In green are represented the GPS2-bound mitochondrial gene promoters (pr mito Gb), in blue the non-mitochondrial GPS2-bound gene promoters (other pr Gb), in red all the mitochondrial gene promoters (all mito).

(G) Boxplot showing decreased transcription by GROseq for both down- and up-regulated mitochondrial genes as defined by RNAseq in 3T3-L1 transfected with siCTL or siGPS2 (p-value<2.2e-16 for both groups).

\* indicate p-value<0.05; \*\* indicate p-value<0.01, \*\*\* indicate p-value<0.001.



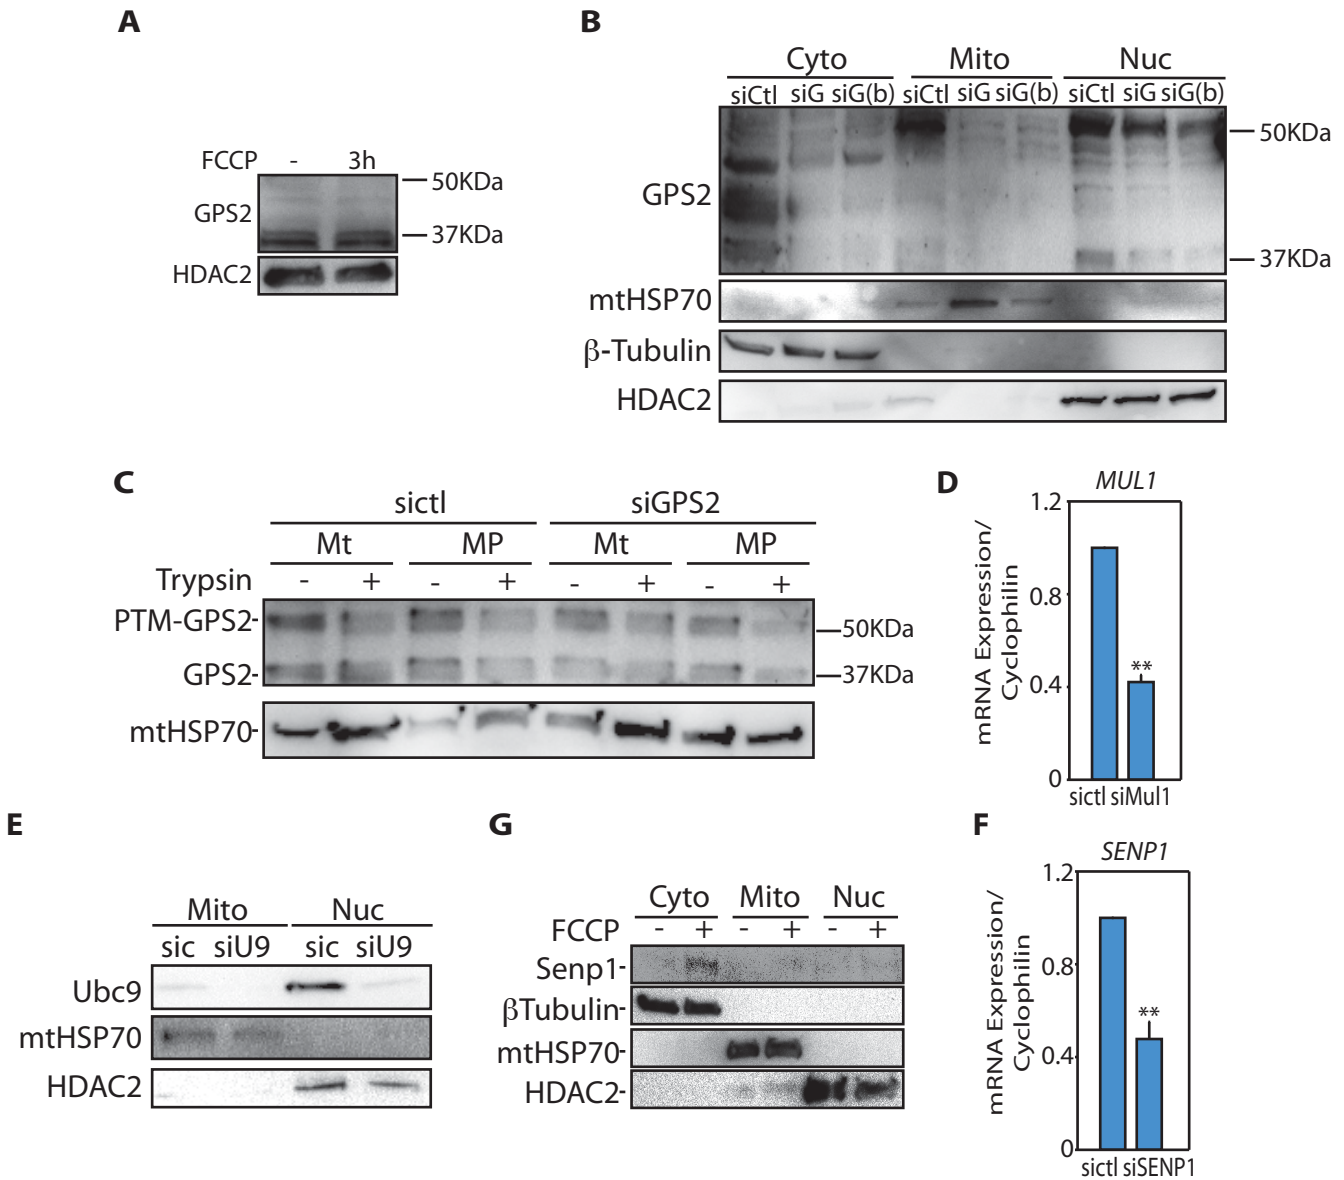

Figure S4 Cardamone et al. 2017

**Supplemental Figure S4. Related to Figure 4.**

**(A)** Total GPS2 protein levels not changing upon FCCP treatment as shown by WB of whole cell extracts.

**(B)** Two different siRNA against GPS2 -siG and siG(b)- were used to show by western blotting of fractionated extracts the specificity of GPS2 bands.

**(C)** Trypsin protection assay showing localization of GPS2 and post translational modified GPS2 (PTM-GPS2) in the mitochondria matrix and outer membrane respectively. Mt stands for isolated mitochondria, MP for mitoplasts.

**(D)** MUL1 siRNA efficiency by qPCR analysis.

**(E)** Ubc9 siRNA efficiency by Western Blot analysis.

**(F)** Western Blot showing increased SENP1 levels in 3T3-L1 cells treated with FCCP.

**(G)** SENP1 siRNA efficiency by qPCR analysis.

\* indicate p-value<0.05; \*\* indicate p-value<0.01.

**A**

## Downregulated Mitochondrial Genes

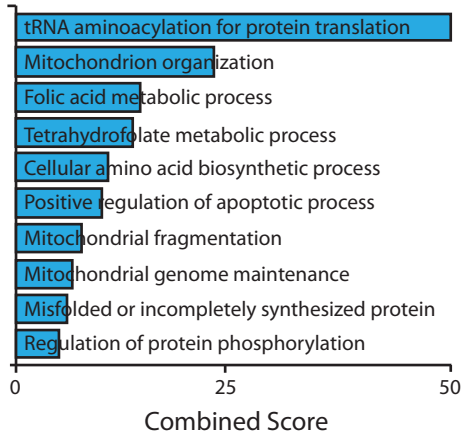

## Upregulated Mitochondrial Genes

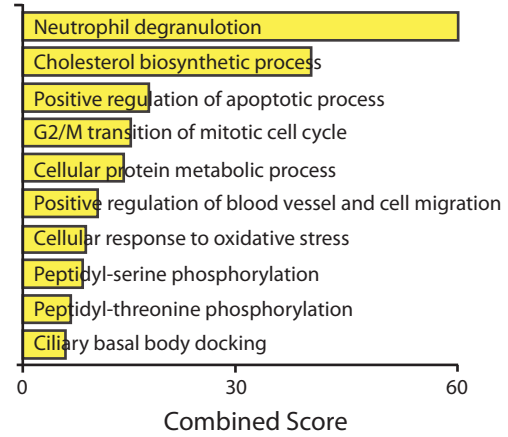**B**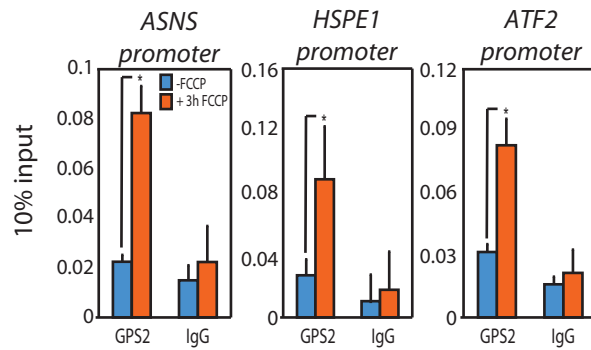

Figure S5 Cardamone et al. 2017

**Supplemental Figure S5. Related to Figure 5.**

**(A)** Analysis of 10 most enriched pathways among mitochondrial genes upregulated or downregulated in response to FCCP depolarization as identified by GROseq (EnrichR, KEGG Pathways).

**(B)** GPS2 ChIP-qPCR analysis in 3T3-L1 cells for genes representative of the pathways indicated in Figure 5C.

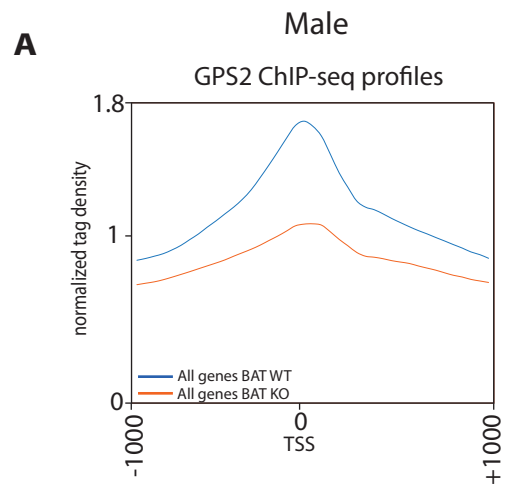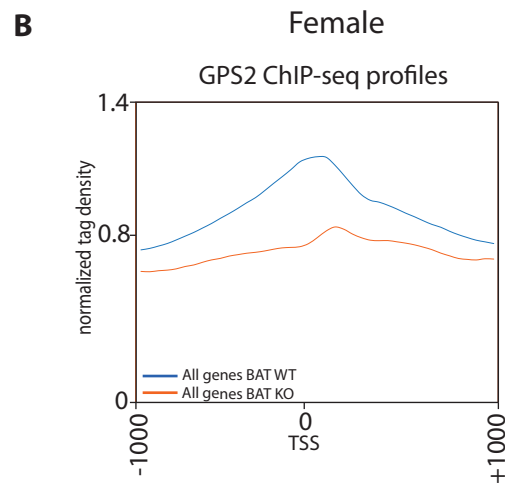

Figure S6 Cardamone et al. 2017

**Supplemental Figure S6. Related to Figure 7.**

**(A) (B)** Tag density profiles showing GPS2 binding on all gene promoters in Male **(A)** and Female **(B)** KO mice.
